# Supplementary material
Source: Springer Nature journal article supplement (https://www.springermedizin.de/resource/supplementary/12990_2008_184_MOESM4_ESM.pdf/9612758)

**A**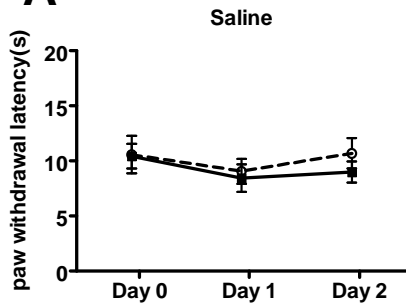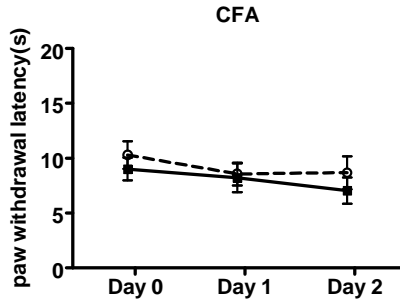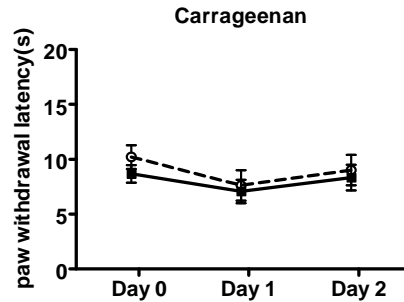**B**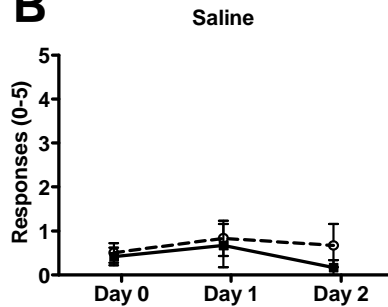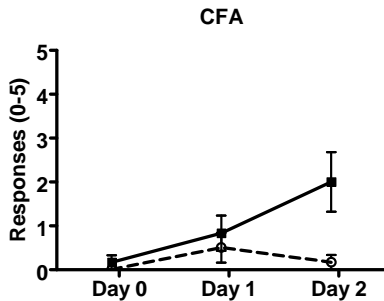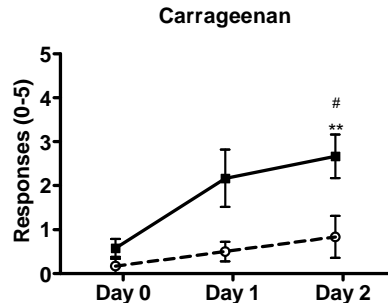

■ WT    ○ KO

Supplement: MOESM4 [file 9612758]
